## **A Message From the Editor**

Dear authors and readers of JSEE,

It has been a great honor to serve as Editor of the *ASME Journal of Solar Energy Engineering* for the last 5 years. The Journal has seen a steady expansion in the number of high quality scientific and technical papers published. I hereby acknowledge the contributions by the authors and by the many reviewers who have voluntarily devoted their time to the peer-reviewing process. I would like to express my sincere gratitude to the Editorial Board, the Guest Editors of topical issues, the Solar Energy Division Executive Committee, and the ASME Publishing staff, whose collective efforts were critical to the successful operation of the Journal. In particular, I thank my Editorial Assistant, Ms. Judy Michel, for the efficient administration of the twenty issues containing 365 papers published during my term.

I am pleased to announce that Dr. Gilles Flamant will assume the position of Editor on January 1, 2010. Dr. Flamant is the Director of the Processes, Materials and Solar Energy Laboratory of CNRS in Odeillo, France. He is one of the leading scholars in the solar energy research community. He has served as Associate Editor in the area of Solar Chemistry and Bioconversion for the past five years and has authored over 180 refereed articles. I am leaving the Journal in good hands.

**Aldo Steinfeld**  
**Professor of Mechanical and Process Engineering**  
**ETH Zurich**  
**Editor, Jan. 1, 2005–Dec. 31, 2009**

## **A Message From the new Editor**

As the new Editor of the *Journal of Solar Energy Engineering*, I would first like to thank Aldo Steinfeld for his outstanding contribution to the scientific and technological high standard maintained during his term.

I have been working for more than 30 years in the field of concentrated solar energy conversion and high temperature processes for CNRS, France (French National Center for Scientific Research). The increase of research activity in renewable energy worldwide pushes the need for reference journals that disseminate the scientific and technical information in the field. I will do my best to actively improve the manner in which the Journal serves the community.

**Gilles Flamant**  
**Director of PROMES-CNRS**  
**France**  
**Editor, as of January 1, 2010**

## Acknowledgment to Reviewers—2009

Abanades, S.  
Adinberg, R.  
Agustin, J.L.B.  
Arakawa, H.  
Armani, M.  
Atienzar, P.  
Badescu, V.  
Bahnfleth, W.  
Barakos, G.  
Bauer, T.  
Beausoleil-Morrison, I.  
Benda, V.  
Benz, N.  
Blake, D.M.  
Blanco-Muriel, M.J.  
Brand, A.  
Brandemuel, M.  
Buck, R.  
Burch, J.  
Cabeza, L.F.  
Caralis, G.  
Carrascosa, M.A.  
Chan, P.K.W.  
Chaviarpolous, P.  
Corbin, C.D.  
Crespo, A.  
Curtiss, P.  
Dai, Y.J.  
Davidson, J.  
Del Cañizo, C.  
Denk, T.  
Dersch, J.  
Desilvestro, H.  
Diver, R.B.  
Dougherty, B.P.  
Drück, H.  
Edoff, M.  
Egido, M.A.  
Egiziano, L.  
Ekaterinaris, J.  
Emery, K.A.  
Ferreira, C.S.  
Feuermann, D.  
Flamant, Gilles  
Floss, A.  
Fuchs, E.F.  
Fuertes, D.  
Funke, C.  
Funke, H.  
Gao, L.  
García Belmonte, G.  
Garcia-Casals, X.  
Giltrap, D.L.  
Glatzmaier, G.C.  
Goertz, V.  
Gokon, N.  
Gómez, R.  
Gonzalez, L.  
Gueymard, C.  
Haberl, J.  
Han, L.  
Hennecke, K.  
Henze, G.P.  
Herkel, S.  
Hermann, J.-M.  
Higuchi, K.  
Howell, J.R.  
Ishihara, T.  
Jähnig, D.  
Jamieson, P.M.  
Jordan, U.  
Kang, Y.S.  
Kelly, B.  
Khouzam, K.  
Kim, K.J.  
Kinoshita, C.  
Kitamura, T.  
Kodama, T.  
Kribus, A.  
Kuznik, F.  
Li, H.  
Lieberman, D.  
López, R.D.  
Lu, L.  
Lüpfert, E.  
Madsen, H.A.  
Mandelberg, E.  
Meier, A.  
Melchior, T.  
Mittelman, G.  
Modest, M.F.  
Morega, A.  
Moriarty, P.  
Morofsky, E.  
Mouzakis, F.  
Mueller, J.  
Munduate, X.  
Munee, T.  
Muñoz, J.  
Murphy, J.  
Myers, D.  
Neveu, P.  
Nofuentes, G.  
Obdam, T.S.  
Ozalp, N.  
Palumbo, R.  
Park, N.G.  
Peinke, J.  
Peña, R.  
Perez, P.J.  
Piatkowski, N.  
Pitz-Paal, R.  
Platzer, W.J.  
Rados, K.  
Reindeers, A.  
Reindl, D.T.  
Riziotis, V.  
Roeb, M.  
Rojas-Bravo, E.  
Romero Alvarez, M.  
Rüther, R.  
Sattler, C.  
Schepers, G.  
Segal, A.  
Seo, T.  
Shen, W.Z.  
Silva, M.A.  
Silvestre, S.  
Spiazzi, G.  
Stein, W.  
Steinfeld, A.  
Steinmann, W.D.  
Tachibana, Y.  
Tamme, R.  
Tellez, F.  
Tobías, I.  
Tsai, S.Y.  
Vaillon, R.  
van Dyk, E.  
Vasekar, P.  
Vázquez, M.  
Viguera-Rodríguez, A.  
von Bremen, L.  
Voutsinas, S.  
Watson, S.  
Weinstock, D.  
Wendelin, T.J.  
Wetzel, T.  
Wieckert, C.  
Wood, B.  
Zarza-Moya, E.  
Zhao, C.Y.
